# Supplementary material for: From a localized H3O radical to a delocalized H3O+⋯e− solvent-separated pair by sequential hydration
Source: Royal Society of Chemistry journal article supplement (doi:10.1039/c1cp20764d), 2011-01-01
Supplement: c1cp20764d.pdf [file c1cp20764d.pdf]

*Electronic Supplementary Information for:*  
From a localized  $\text{H}_3\text{O}$  radical to a delocalized  $\text{H}_3\text{O}^+ \cdots e^-$   
solvent-separated pair by sequential hydration

Frank Uhlig, Ondrej Marsalek, and Pavel Jungwirth\*

The file `W3-H3O-MEP-01.avi` contains animation of the process of hydrogen abstraction from the  $\text{H}_3\text{O}(\text{H}_2\text{O})_3$  cluster. The geometries follow a minimum energy path as calculated with the Nudged Elastic Band method. Contours of the RI-MP2 spin density are displayed at values 0.001 and 0.003  $e \cdot \text{Bohr}^{-3}$ . Energies along this minimum energy path are shown in the top panel of Fig. 7.

---

*Institute of Organic Chemistry and Biochemistry, Academy of Sciences of the Czech Republic and Center for Biomolecules and Complex Molecular Systems, Flemingovo nám. 2, 16610 Prague 6, Czech Republic; Tel: +420 220 410 314; E-mail: pavel.jungwirth@uochb.cas.cz*
